# Supplementary material for: Enhancing the effect of bisulfite on sequestration of selenite by zerovalent iron
Source: Royal Society of Chemistry journal article supplement (doi:10.1039/c5ra14659c), 2015-01-01
Supplement: c5ra14659c1.pdf [file c5ra14659c1.pdf]

Electronic Supplementary Information (ESI)

**Enhancing Effect of Bisulfite on Sequestration of  
Selenite by Zerovalent Iron**

Jinxiang Li,<sup>a‡</sup> Chao Wang,<sup>a‡</sup> Junlian Qiao,<sup>\*a</sup> Hejie Qin<sup>ab</sup> and Lina Li<sup>b</sup>

<sup>a</sup>State Key Laboratory of Pollution Control and Resources Reuse, College of Environmental Science and Engineering, Tongji University, Shanghai 200092, People's Republic of China

<sup>b</sup>Shanghai Synchrotron Radiation Facility, Shanghai Institute of Applied Physics, Chinese Academy of Sciences, Shanghai 201204, People's Republic of China

<sup>‡</sup>Authors contributed equally to this work.

E-mail addresses: ljx870616@126.com (J.X. Li), wangchao962@163.com (C. Wang), qiaoqiao@tongji.edu.cn (J.L. Qiao), chinhj@foxmail.com (H.J. Qin), lilina@sinap.ac.cn (L.N. Li)

\*Author to whom correspondence should be addressed

Junlian Qiao, email: qiaoqiao@tongji.edu.cn; phone: +86-021-65489163

Number of pages (including this page): 11

Number of Figures: 7

## Summary

**Figure S1.** SEM (a), particle size distribution (b) and Raman spectra (c) of the pristine ZVI employed in this study. (Page S4)

**Figure S2.** The effect of  $\text{HSO}_3^-$  on the transformation of Se(IV). Reaction conditions:  $[\text{Se(IV)}]_0 = 10.0 \text{ mg L}^{-1}$ ,  $[\text{HSO}_3^-]_0 = 2.0 \text{ mM}$ ,  $[\text{pH}]_{\text{ini}} = 5.0$ ,  $V_{\text{air}} = 2.0 \text{ mL}$ . (Page S5)

**Figure S3.** Correlation of Se(IV) removal rate with the headspace ( $V_{\text{air}}$ ) in the presence of  $\text{SO}_4^{2-}$ . Reaction conditions:  $[\text{Fe}^0] = 2.0 \text{ mM}$ ,  $[\text{Se(IV)}]_0 = 10.0 \text{ mg L}^{-1}$ ,  $[\text{SO}_4^{2-}]_0 = 2.0 \text{ mM}$ ,  $\text{pH}_{\text{ini}} = 5.0$ . (Page S6)

**Figure S4.** Correlation of Se(IV) removal rate with the headspace ( $V_{\text{air}}$ ) in the presence of  $\text{HSO}_3^-$ . Reaction conditions:  $[\text{Fe}^0] = 2.0 \text{ mM}$ ,  $[\text{Se(IV)}]_0 = 10.0 \text{ mg L}^{-1}$ ,  $[\text{HSO}_3^-]_0 = 2.0 \text{ mM}$ ,  $\text{pH}_{\text{ini}} = 5.0$ . (Page S7)

**Figure S5.** SEM images of the Se(IV)-treated ZVI corrosion products with the presence of  $\text{SO}_4^{2-}$  or  $\text{HSO}_3^-$  at different reaction time. Reaction conditions:  $[\text{Fe}^0] = 2.0 \text{ mM}$ ,  $[\text{Se(IV)}]_0 = 10.0 \text{ mg L}^{-1}$ ,  $[\text{SO}_4^{2-}/\text{HSO}_3^-]_0 = 2.0 \text{ mM}$ ,  $\text{pH}_{\text{ini}} = 5.0$ ,  $V_{\text{air}} = 2.0 \text{ mL}$ . (Page S8)

**Figure S6.** Theoretical calculation of the distribution of Se(IV) at variable pH. (Page S9)

**Figure S7.** Variations in dissolved Fe(II) and pH during Se(IV) removal by ZVI at various  $\text{pH}_{\text{ini}}$  levels. Reaction conditions:  $[\text{Fe}^0] = 2.0 \text{ mM}$ ,  $[\text{Se(IV)}]_0 = 10.0 \text{ mg L}^{-1}$ ,  $[\text{HSO}_3^-/\text{SO}_4^{2-}]_0 = 2.0 \text{ mM}$ ,  $V_{\text{air}} = 2.0 \text{ mL}$ . (Page S10)

**Table S1.** Speciation of Fe in Se(IV)-treated ZVI corrosion products based on LCF of

Fe  $k^3$ -weighted EXAFS spectra (Data were given as % values). (Page S11)

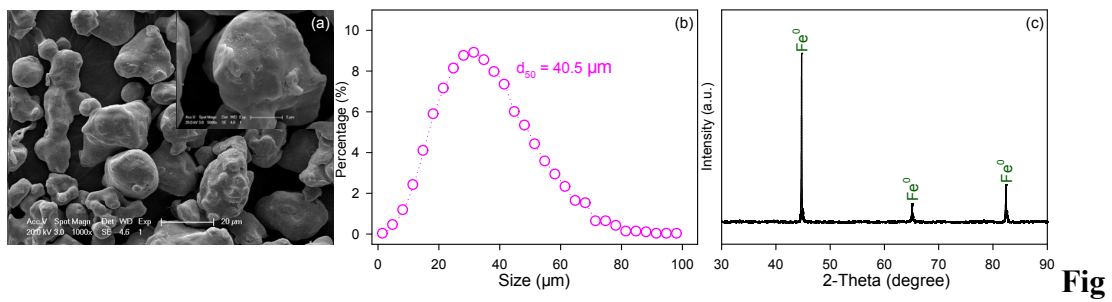

**Figure S1.** SEM (a), particle size distribution (b) and XRD (c) of the pristine ZVI employed in this study.

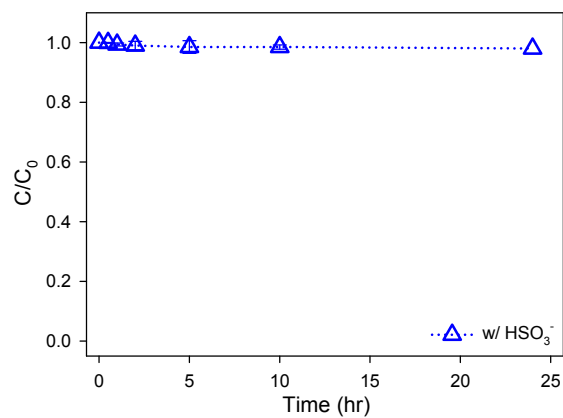

**Figure S2.** The effect of  $\text{HSO}_3^-$  on the transformation of Se(IV). Reaction conditions:

$[\text{Se(IV)}]_0 = 10.0 \text{ mg L}^{-1}$ ,  $[\text{HSO}_3^-]_0 = 2.0 \text{ mM}$ ,  $[\text{pH}]_{\text{ini}} = 5.0$ ,  $V_{\text{air}} = 2.0 \text{ mL}$ .

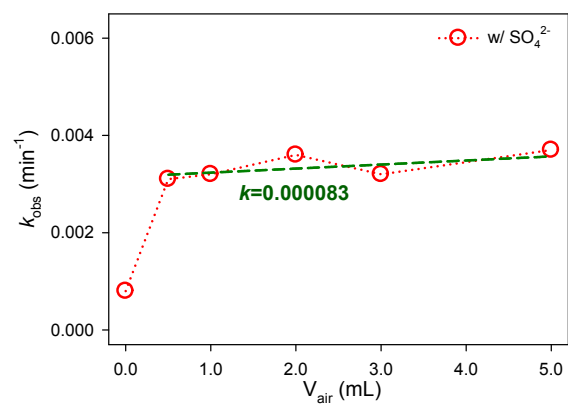

**Figure S3.** Correlation of Se(IV) removal rate with the headspace ( $V_{\text{air}}$ ) in the presence of  $\text{SO}_4^{2-}$ . Reaction conditions:  $[\text{Fe}^0] = 2.0 \text{ mM}$ ,  $[\text{Se(IV)}]_0 = 10.0 \text{ mg L}^{-1}$ ,  $[\text{SO}_4^{2-}]_0 = 2.0 \text{ mM}$ ,  $\text{pH}_{\text{ini}} = 5.0$ .

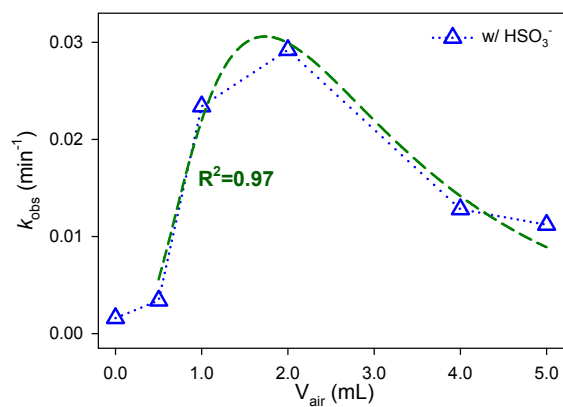

**Figure S4.** Correlation of Se(IV) removal rate with the headspace ( $V_{\text{air}}$ ) in the presence of  $\text{HSO}_3^-$ . Reaction conditions:  $[\text{Fe}^0] = 2.0 \text{ mM}$ ,  $[\text{Se(IV)}]_0 = 10.0 \text{ mg L}^{-1}$ ,  $[\text{HSO}_3^-]_0 = 2.0 \text{ mM}$ ,  $\text{pH}_{\text{ini}} = 5.0$ .

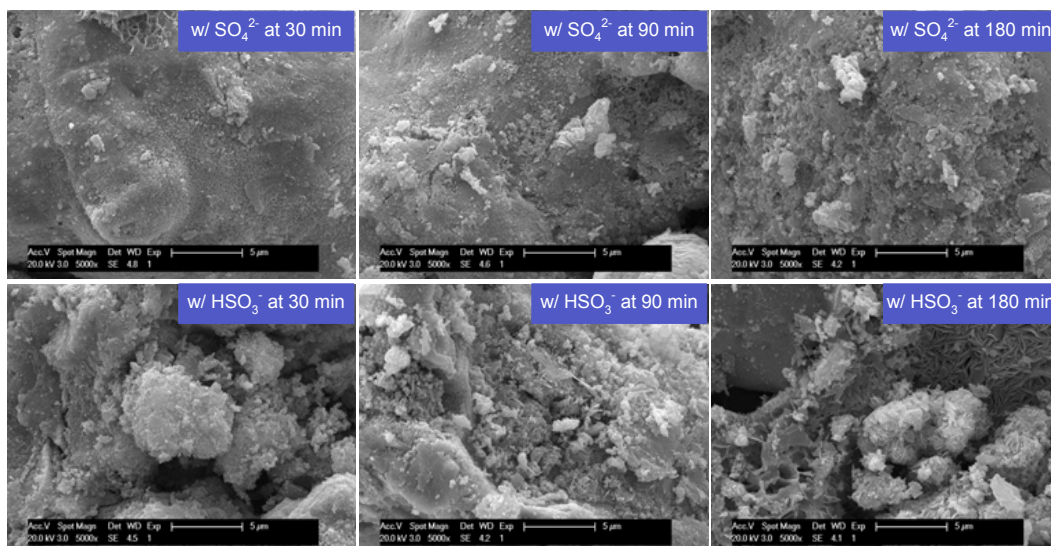

**Figure S5.** SEM images of the Se(IV)-treated ZVI corrosion products with the presence of  $\text{SO}_4^{2-}$  or  $\text{HSO}_3^-$  at different reaction time. Reaction conditions:  $[\text{Fe}^0] = 2.0$  mM,  $[\text{Se(IV)}]_0 = 10.0$  mg  $\text{L}^{-1}$ ,  $[\text{SO}_4^{2-}/\text{HSO}_3^-]_0 = 2.0$  mM,  $\text{pH}_{\text{ini}} = 5.0$ ,  $V_{\text{air}} = 2.0$  mL.



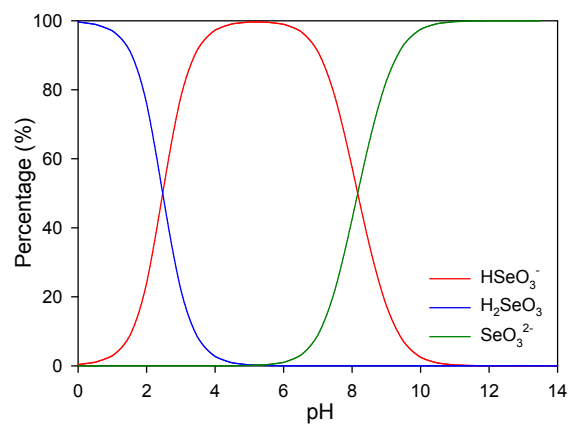

**Figure S6.** Theoretical calculation of the distribution of Se(IV) at variable pH.

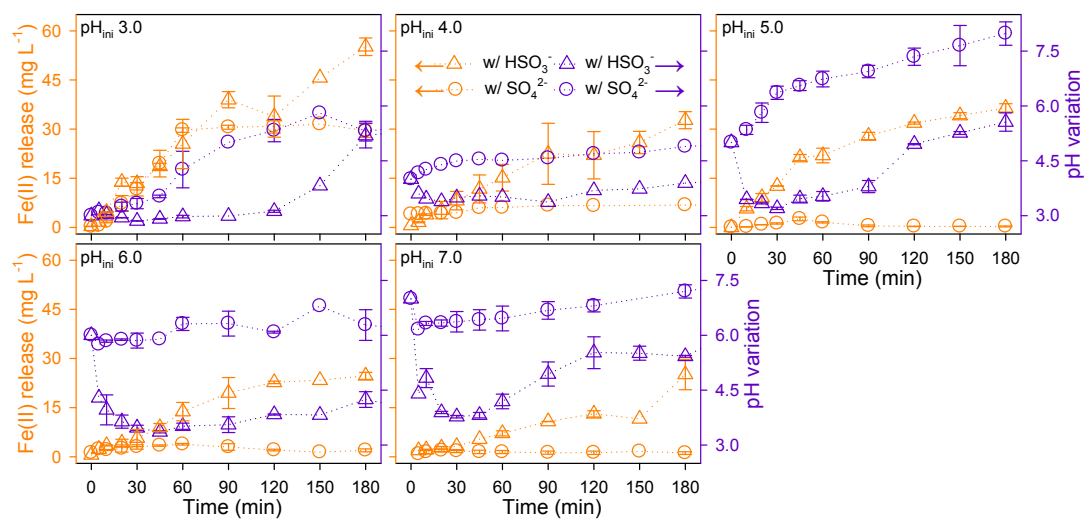

**Figure S7.** Variations in dissolved Fe(II) and pH during Se(IV) removal by ZVI at various  $\text{pH}_{\text{ini}}$  levels. Reaction conditions:  $[\text{Fe}^0] = 2.0 \text{ mM}$ ,  $[\text{Se(IV)}]_0 = 10.0 \text{ mg L}^{-1}$ ,  $[\text{HSO}_3^-/\text{SO}_4^{2-}]_0 = 2.0 \text{ mM}$ ,  $V_{\text{air}} = 2.0 \text{ mL}$ .

**Table S1.** Speciation of Fe in Se(IV)-treated ZVI corrosion products based on LCF of Fe  $k^3$ -weighted EXAFS spectra (Data were given as % values).

| Sample ID                        | Material References |         |           |              |               |          |           |
|----------------------------------|---------------------|---------|-----------|--------------|---------------|----------|-----------|
|                                  | Fe <sup>0</sup>     | Wustite | Magnetite | Ferrihydrite | Lepidocrocite | Goethite | Maghemite |
| w/ SO <sub>4</sub> <sup>2-</sup> | 19.1                | 20.4    | 43.0      | 9.5          | 8.0           | --       | --        |
| w/ HSO <sub>3</sub> <sup>-</sup> | 5.4                 | 8.2     | 57.7      | --           | 19.4          | --       | 9.3       |
